# Supplementary material for: Complex Formation and Function of Estrogen Receptor α in Transcription Requires RIP140
Source: Oxford University Press journal article supplement (doi:10.1158/0008-5472.can-13-3429), 2014-08-22
Supplement: 00085472can133429-sup-123254_2_supp_2543672_n81dp7.docx [file 00085472can133429-sup-123254_2_supp_2543672_n81dp7.docx]

| Supplementary Table S1: primer sequences | | |  |
| --- | --- | --- | --- |
|  |  | FW | Rv |
| ChIP |  |  |  |
|  | TFF1 | GTTGGGAGCTAGGATGGTCA | AGTGAGTGGCGGATTTGAAC |
|  | HES | GGCTGGGTGTGATTGAAAGA | AAGGTCACAGTGGGTTGGAG |
|  | RIP140 | GACCTGGCCCAGATAGATCA | TATAATGTAGGGGCGCAACC |
|  | Myc | GGCTCACCCTTGCTGATGCT | GCTCTGGGCACACACATTGG |
|  | XBP1 | ATACTTGGCAGCCTGTGACC | GGTCCACAAAGCAGGAAAAA |
|  | GREB1 | GAAGGGCAGAGCTGATAACG | GACCCAGTTGCCACACTTTT |
|  | CCDN1 | GCCAGACAACATTAGCCACA | CCCATTTCTTAGCTGGGTCA |
|  | FOS | GGGCACTTACACACACATGC | ATGATACTCGCGAGCAGAGG |
|  | PR | TAACGGGTGGAAATGCCAACT | TCTGCTGGCTCCGTACTGCGG |
|  | Random 1 negative control | TCTGCTGGCTCCGTACTGCGG | GGCTGATTCCCTGCCCAGCG |
|  |  |  |  |
| RT-qPCR | RIP140 | TCGCACTCACCACAGAAAAC | AGCCAAGCTCTTCTCCATGT |
|  | Myc | GCCACGTCTCCACACATCAG | TCTTGGCAGCAGGATAGTCCT |
|  | XBP1 | GCGCCTCACGCACCTG | GCTGCTACTCTGTTTTTCAGTTTCC |
|  | GREB1 | CAAAGAATAACCTGTTGGCCCTGC | GACATGCCTGCGCTCTCATACTTA |
|  | CCDN1 | TGGAGGTCTGCGAGGAACAGAA | TGCAGGCGGCTCTTTTTCA |
|  | FOS | CGTCTTCCTTCGTCTTCACC | GTCAGAGGAAGGCTCATTGC |
|  | RARA | CGCTGCTGGAGGCGCTAAAG | GCGCTGATGCTTCGCAGGTC |
|  | AREG | GTGGT- GCTGTCGCTCTTGATA | ACTCACAGGG- GAAATCTCACT |
|  | PRA | GAGCACTGGATGCTGTTGCT | GGCTTAGGGCTTGGCTTTC |
|  | TFF1 | GTGTCACGCCCTCCCAGT | GGACCCCACGAACGGTG |
|  | HES1 | AGGCCACCCCTCCTCCTA | GTTTAGAGTCCGGAGGGAAGAGA |
|  | ESR1 | TGATTGGTCTCGTCTGGCG | CATGCCCTCTACACATTTTCCC |
|  | 18S negative control | GCTTAATTTGACTCAACACGGGA | AGCTATCAATCTGTCAATCCTGTC |
